# Supplementary material for: Learning by Heart or with Heart: Brain Asymmetry Reflects Pedagogical Practices
Source: MDPI journal article supplement (doi:10.3390/brainsci13091270), 2023-08-31
Supplement: s1 [file s1]

## SUPPLEMENTARY INFORMATION

### Learning By Heart Or *With* Heart: Brain Asymmetry Reflects Pedagogical Practices

Martin Schetter, David Romascano, Mathilde Gaujard, Christian Rummel & Solange Denervaud

| <i>Statistics of the Model</i>   |                                          |                                         |                           |                |
|----------------------------------|------------------------------------------|-----------------------------------------|---------------------------|----------------|
| Variable                         | <i>F</i>                                 | <i>R</i> <sup>2</sup>                   | <i>Degrees of Freedom</i> | <i>p-value</i> |
| <i>CThAI</i>                     | 2.67                                     | 0.12                                    | 5, 95                     | 0.027          |
| <i>Coefficients of the Model</i> |                                          |                                         |                           |                |
| Variable                         | $\beta$ -coefficient                     | <i>SE</i>                               | <i>Test statistic</i>     | <i>p-value</i> |
| <b>Intercept</b>                 | <b><math>1.22 \times 10^{-2}</math></b>  | <b><math>5.23 \times 10^{-3}</math></b> | <b>2.35</b>               | <b>0.021</b>   |
| Age                              | $8.25 \times 10^{-5}$                    | $3.33 \times 10^{-4}$                   | 0.25                      | 0.805          |
| Pedagogy (T-M)                   | $8.00 \times 10^{-3}$                    | $5.00 \times 10^{-3}$                   | 1.60                      | 0.113          |
| Sex ( $\sigma$ - $\varphi$ )     | $-2.27 \times 10^{-3}$                   | $1.44 \times 10^{-3}$                   | -1.57                     | 0.119          |
| SES                              | $-2.43 \times 10^{-3}$                   | $1.26 \times 10^{-3}$                   | -1.93                     | 0.056          |
| <b>Age X Pedagogy (T-M)</b>      | <b><math>-9.23 \times 10^{-4}</math></b> | <b><math>4.60 \times 10^{-4}</math></b> | <b>-2.01</b>              | <b>0.048</b>   |

**Table S1** Coefficients of the MLR model related to the CTh AI at the whole-brain level: M stands for Montessori; T stands for Traditional; Age X Pedagogy stands for the interaction term. Significant terms are highlighted in bold.

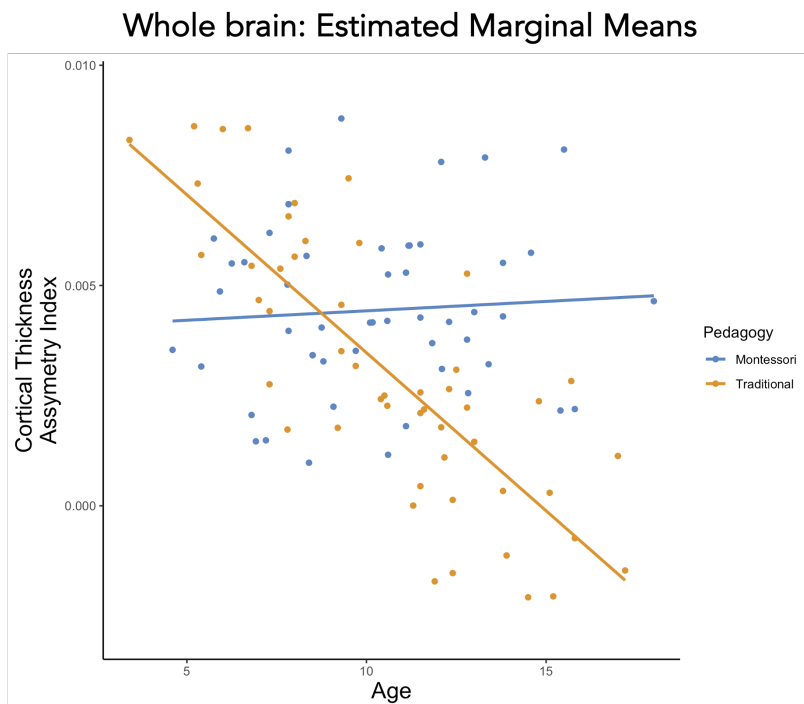

**Figure S1** Development of the CTh AI in the whole brain for Montessori- and traditionally schooled participants: Data points are the values predicted by the model that take into account the effects of gender and SES.
